# Supplementary material for: Growth of well-developed LaOCl microplates by chloride salt-assisted method
Source: Royal Society of Chemistry journal article supplement (doi:10.1039/c7ce00549k), 2017-01-01
Supplement: c7ce00549k1.pdf [file c7ce00549k1.pdf]

## Supporting Information

### Growth of Well-Developed LaOCl Microplates by Chloride Salt-assisted

#### Method

Zhong Huang<sup>a</sup> Haijun Zhang<sup>a,\*</sup> Shaowei Zhang<sup>b</sup>

<sup>a</sup>*The State Key Laboratory of Refractories and Metallurgy, Wuhan University of Science and Technology, Wuhan 430081, China*

<sup>b</sup>*College of Engineering, Mathematics and Physical Sciences, University of Exeter, Exeter EX4 4QF, UK*

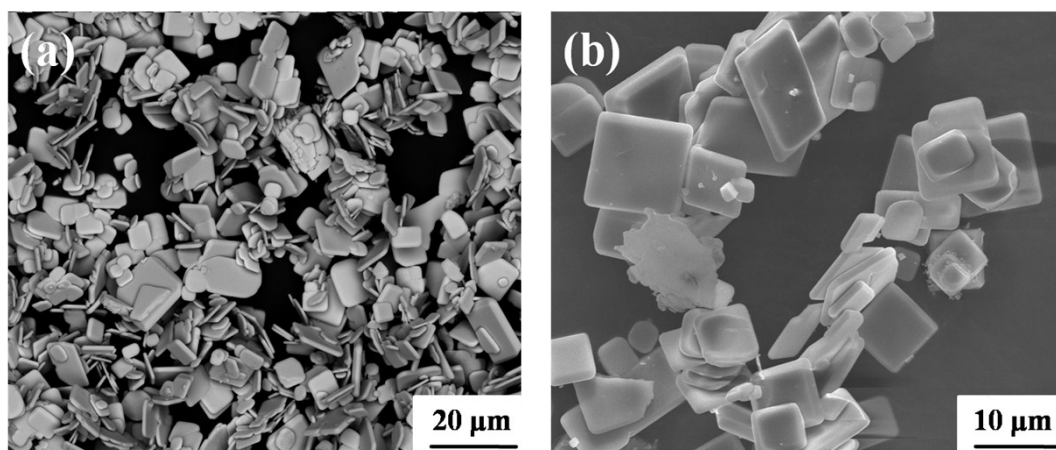

*Figure S1* FE-SEM images of samples resultant from 3 h firing at 800°C in (a) KCl-LiCl; (b) LiCl.

It can be clearly observed that the LaOCl particles both exhibited the plate-like structure with the similar thickness and width.

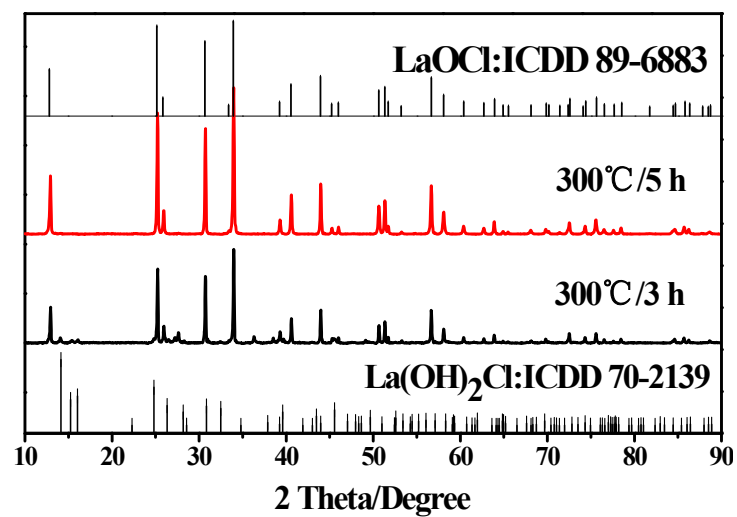

*Figure S2* XRD patterns of the  $\text{LaOCl}$  prepared in  $\text{KCl-LiCl}$  at  $300^\circ\text{C}$  with the different holding temperatures. It showed prolonging the holding time to 5 h can result in the formation of phase pure  $\text{LaOCl}$  at  $300^\circ\text{C}$ .

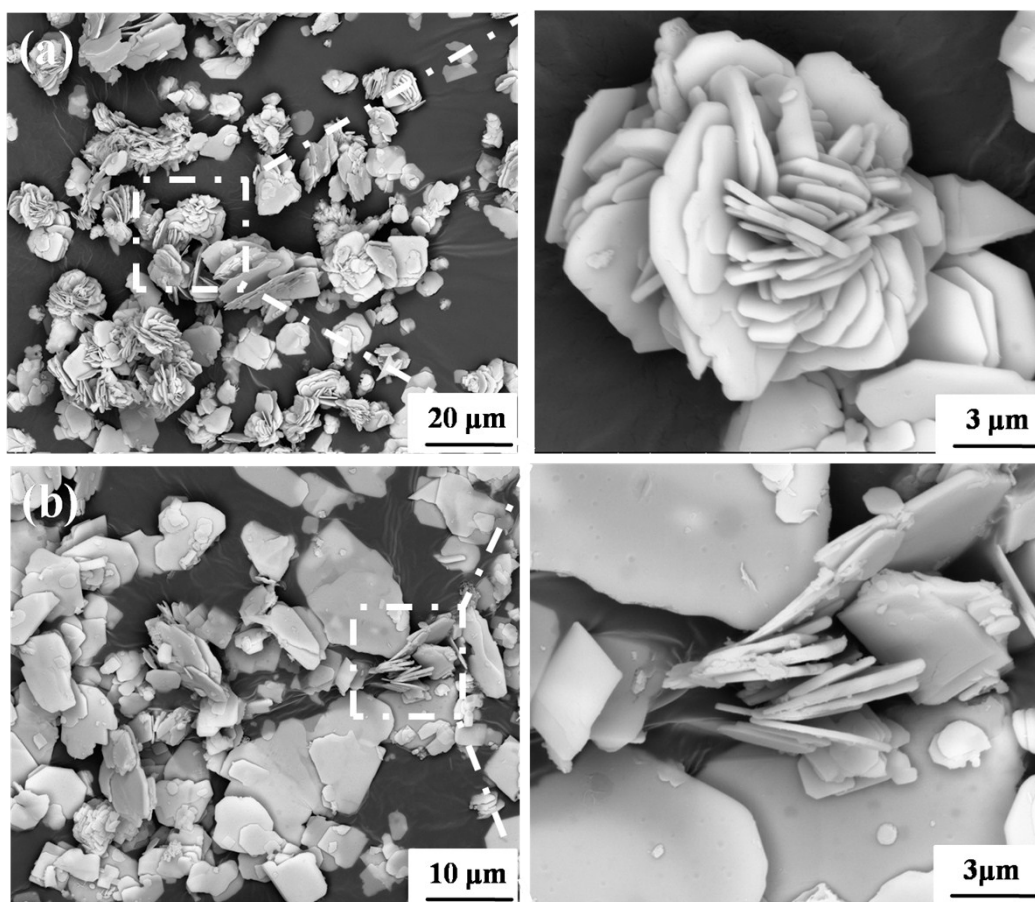

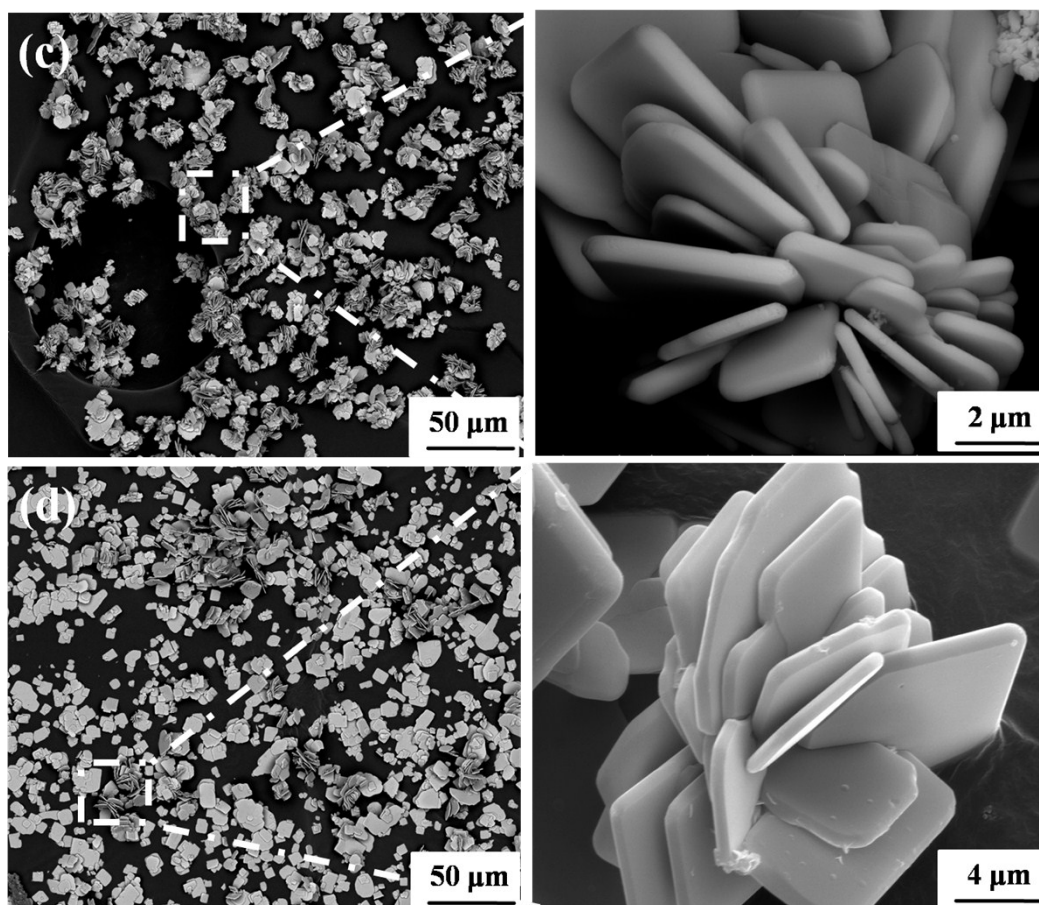

*Figure S3* FE–SEM images of the samples firing at various temperatures in KCl–LiCl: (a) 400°C; (b) 500°C; (c) 600°C; (d) 700°C. These results demonstrated that the higher temperature led to a rapid growth of the LaOCl micro-crystalline with thick thickness and the highly dispersed LaOCl microplates. Moreover in all above samples, the helical topology of LaOCl can be clearly observed.

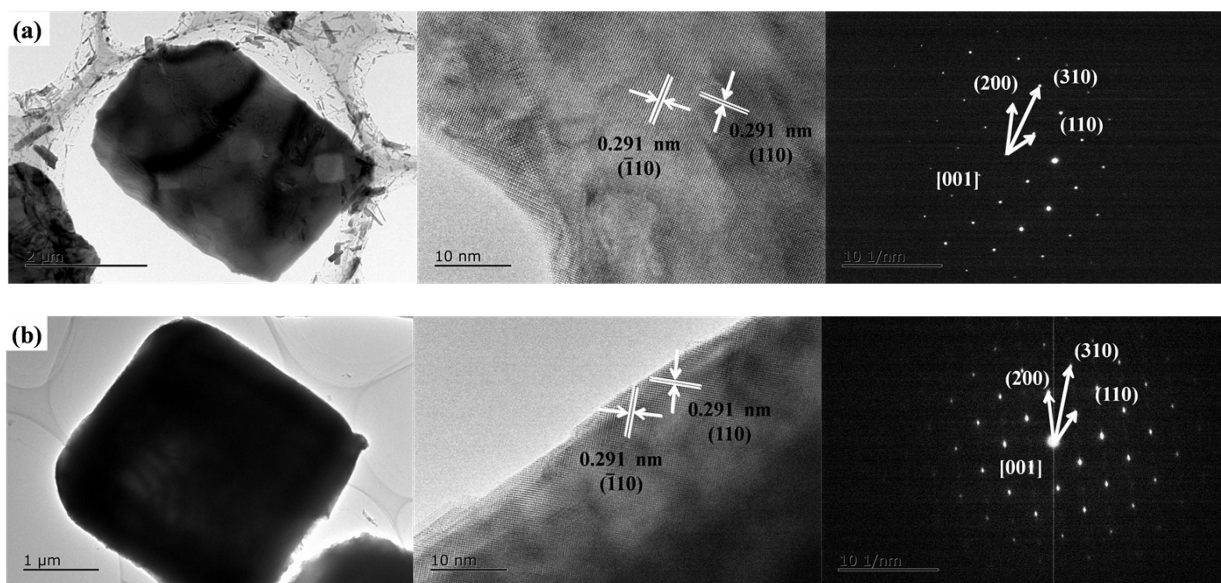

Figure S4 TEM, HRTEM and SAED images of the LaOCl prepared in KCl-LiCl at (a) 350 °C and in (b) LiCl at 800 °C. Both of these two samples exhibited the (001) preferential orientation.

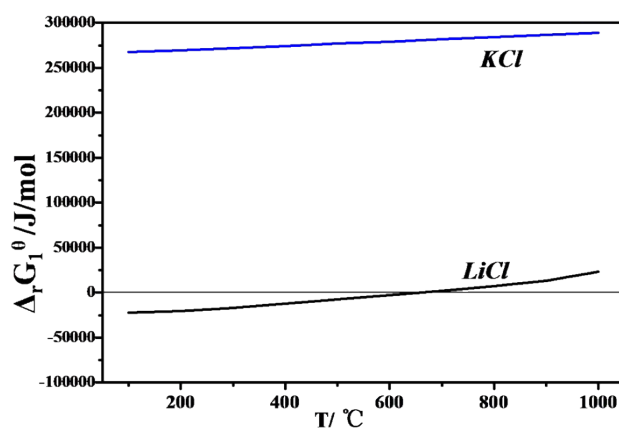

Figure S5 Temperature dependence of  $\Delta_r G_1^\circ$  of reaction (1). It indicates that Reaction (1) could occur at test temperatures only when LiCl as the starting chloride.

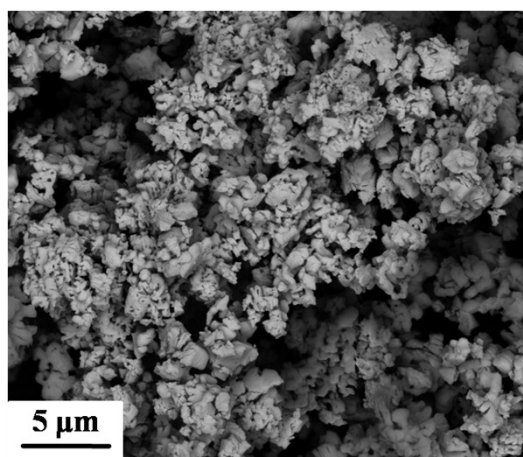

*Figure S6* FE-SEM images of the raw  $\text{La}_2\text{O}_3$  powders. It showed the  $\text{La}_2\text{O}_3$  had a spongy-like structure with the average size of about 1  $\mu\text{m}$ , which was completely different to the as-prepared  $\text{LaOCl}$  microplate.

*Table S1.* Comparison of the firing condition and morphology of present LaOCl microplates and some LaOCl powders in published literatures. Interestingly, we found there is no report of the well-developed LaOCl plates in the published literatures. In most case, completely no or only small amount of the obtained LaOCl powders had the plate-like structures. The comparisons indicated that the present method provided the good growth condition for the formation of LaOCl plates.

| Reference        | Method                               | Reaction Temperature | Morphology and Size                                                                      |
|------------------|--------------------------------------|----------------------|------------------------------------------------------------------------------------------|
| [5, 10]          | Sol-gel                              | 600–800°C            | Nanoparticle; Nanostick,<br>Size: hundreds of nanometers                                 |
| [11]             | Precipitation                        | 550°C                | Not shown                                                                                |
| [12]             | Combustion                           | 500°C*               | Thin flakes with a little amount of the<br>spherical particles,<br>Size: several microns |
| [8, 13, 14]      | Electrospinning                      | 700–900°C*           | Nanofibers,<br>Diameter: 200–500 nm                                                      |
| Present<br>paper | Chloride salt-<br>assisted<br>method | 300°C                | Microplates,<br>Side length: several microns;<br>Thickness: 200–500 nm                   |

\*The reaction temperature refers to the subsequent calculation treatment after the fabrication.
